# Supplementary figures and images for: Reverse-correlation analysis of navigation dynamics in Drosophila larva using optogenetics
Source: eLife journal article supplement (doi:10.7554/elife.06225), 2015-05-05

Figure 1-figure supplement 1

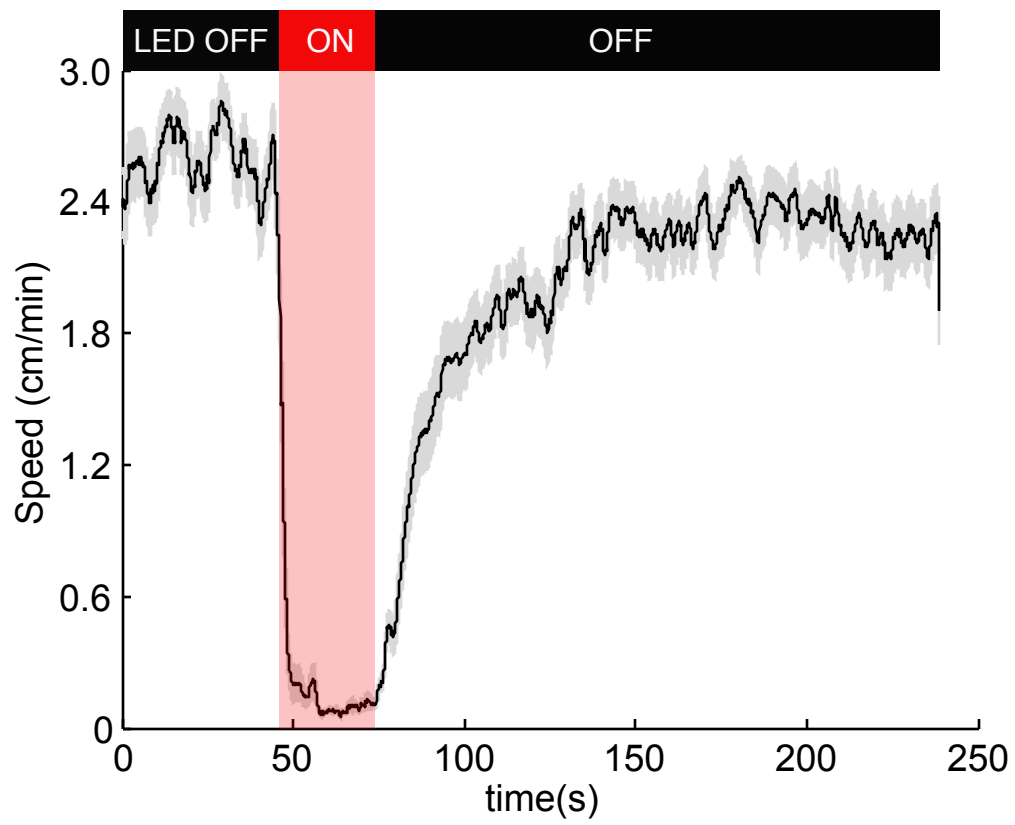

Supplement: supp [file elife-06225-supp-v1.zip]

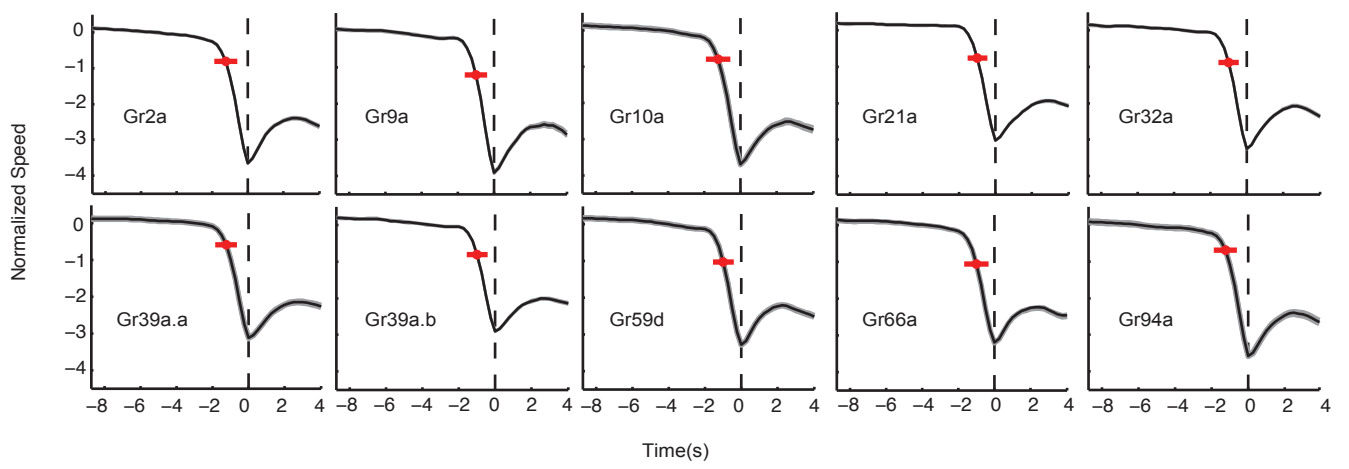

Supplement: supp [file elife-06225-supp-v1.zip]

**A**  
Gr9a  
C1

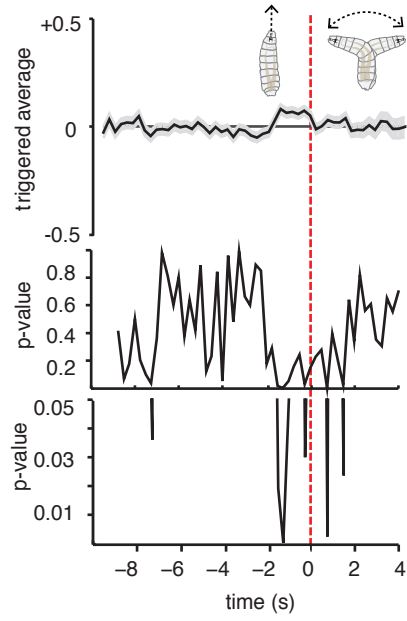

**B**  
Gr94a  
C2

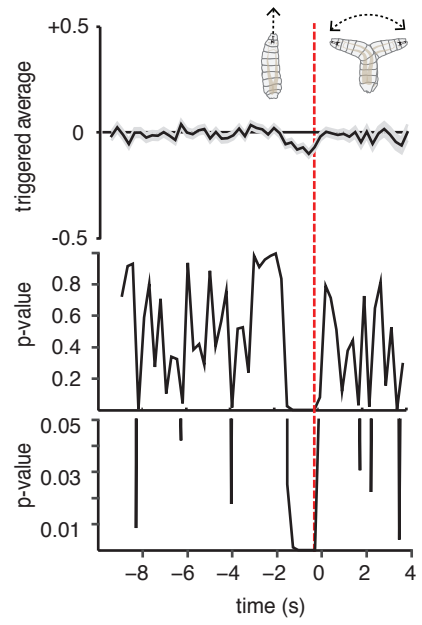

Supplement: supp [file elife-06225-supp-v1.zip]

**A**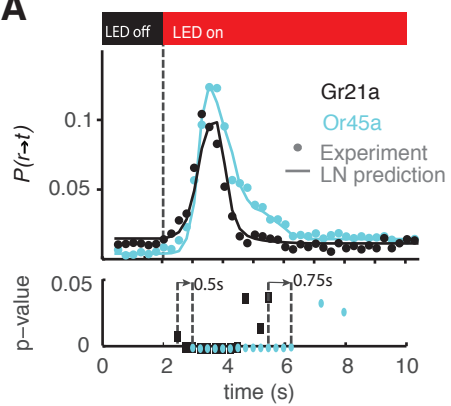**B**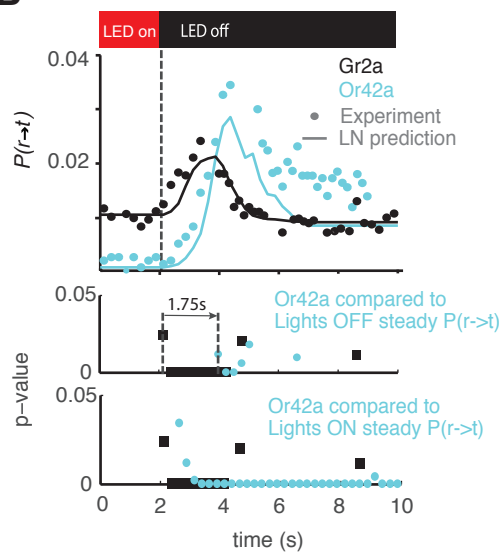

Supplement: supp [file elife-06225-supp-v1.zip]

Figure 3-figure supplement 1

**A** *Gr21a-Gal4 x UAS-CsChrimson*

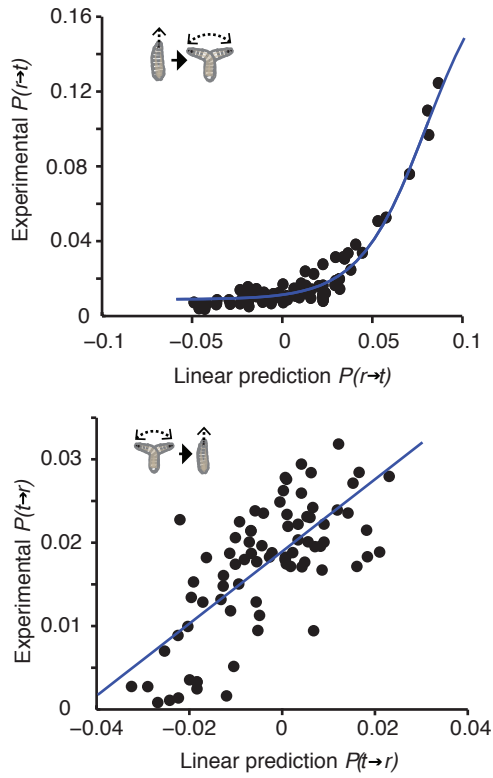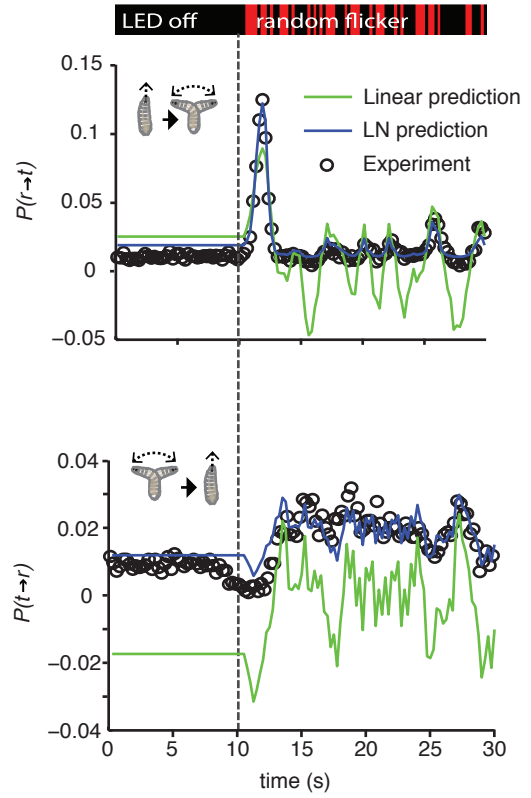

**B** *Gr10a-Gal4 x UAS-CsChrimson*

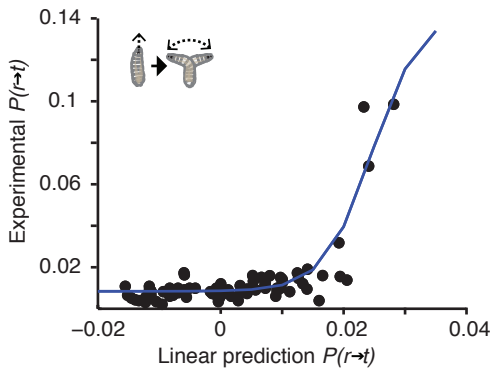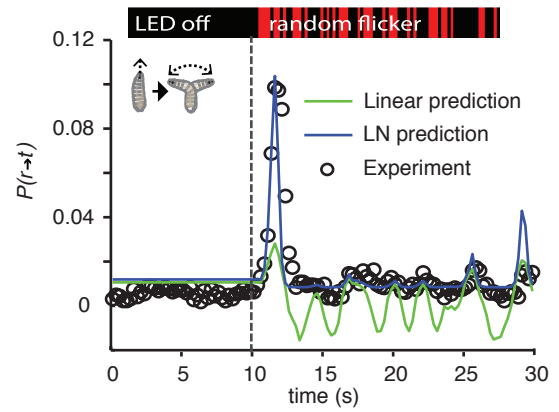

Supplement: supp [file elife-06225-supp-v1.zip]

Figure 3-figure supplement 2

**A** *Or42a-Gal4 x UAS-CsChrimson*

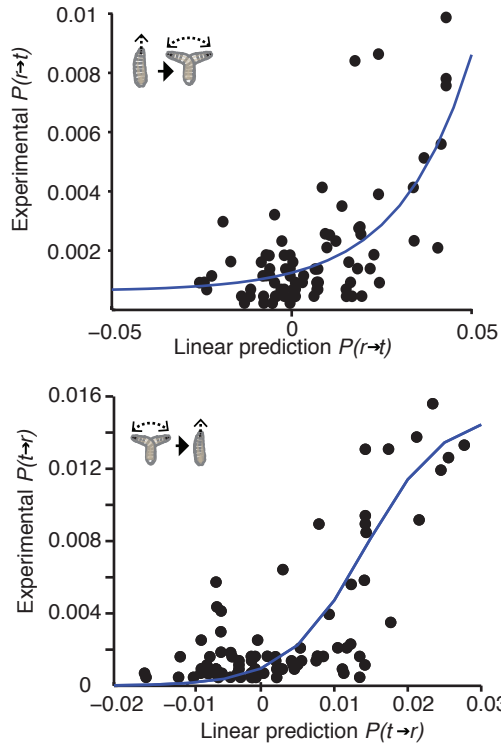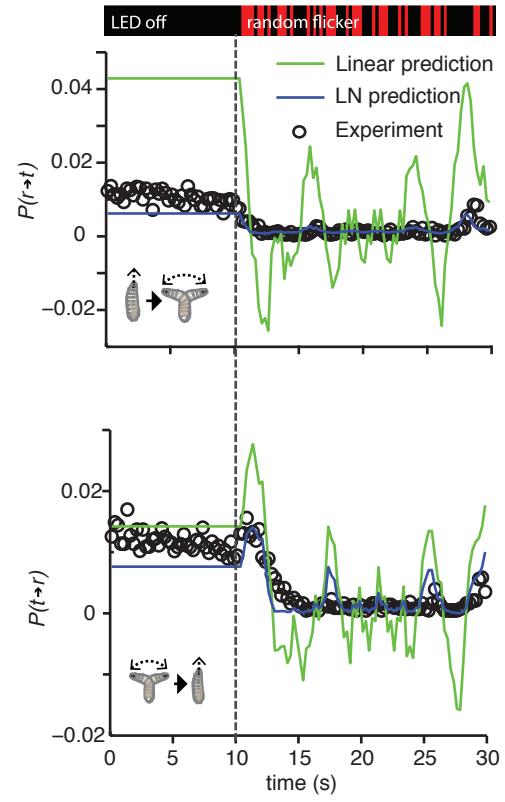

**B** *Gr2a-Gal4 x UAS-CsChrimson*

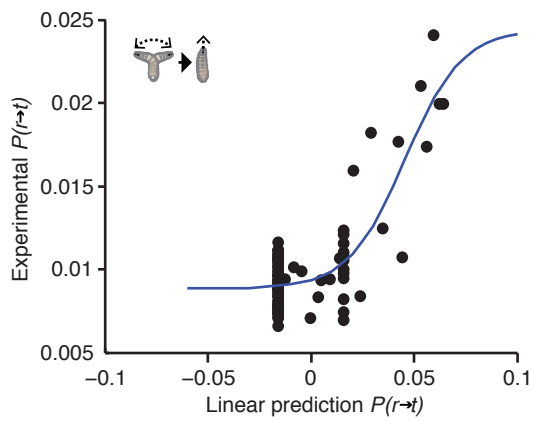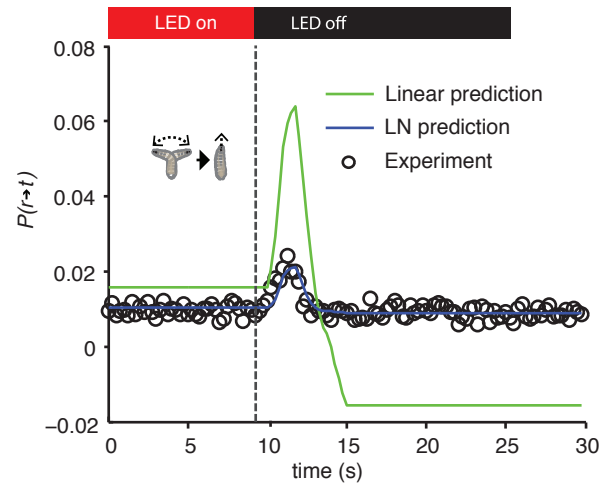

Supplement: supp [file elife-06225-supp-v1.zip]
